# Supplementary material for: Ultrastructural analysis of the decellularized cornea after interlamellar keratoplasty and microkeratome-assisted anterior lamellar keratoplasty in a rabbit model
Source: PubMed Central journal article supplement (PMC4904214; doi:10.1038/srep27734), 2016-06-13
Supplement: srep27734-s1.pdf [file srep27734-s1.pdf]

Supporting Information

**Ultrastructural analysis of the decellularized cornea after interlamellar keratoplasty and microkeratome-assisted anterior lamellar keratoplasty in a rabbit model**

Yoshihide Hashimoto, Shinya Hattori, Shuji Sasaki, Takako Honda, Tsuyoshi Kimura, Seiichi Funamoto, Hisatoshi Kobayashi & Akio Kishida

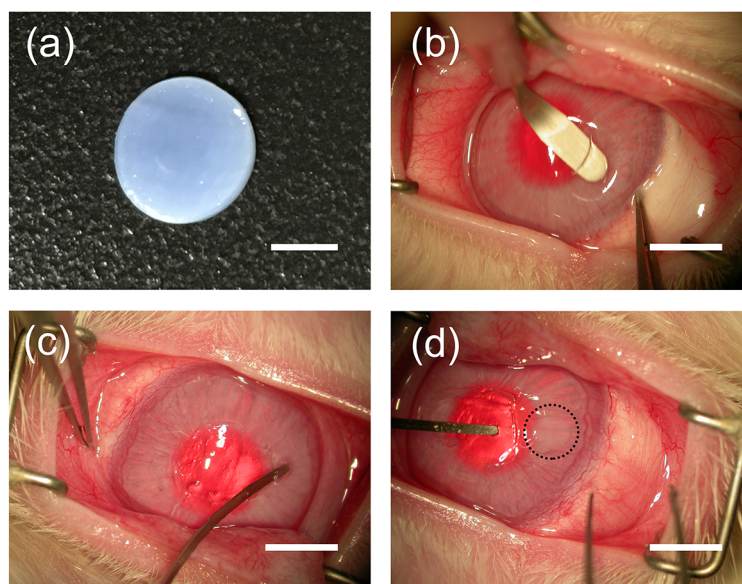

**Supplementary Figure 1. The surgical procedure of interlamellar keratoplasty.** Decellularized corneal disc of 2 mm in diameter (a). The corneal pocket was prepared using a crescent knife (b). The decellularized cornea was inserted into the corneal pocket (c, d). The dotted circle indicates the transplanted decellularized cornea. Scale bars: 1 mm in a; 4 mm in b–d.

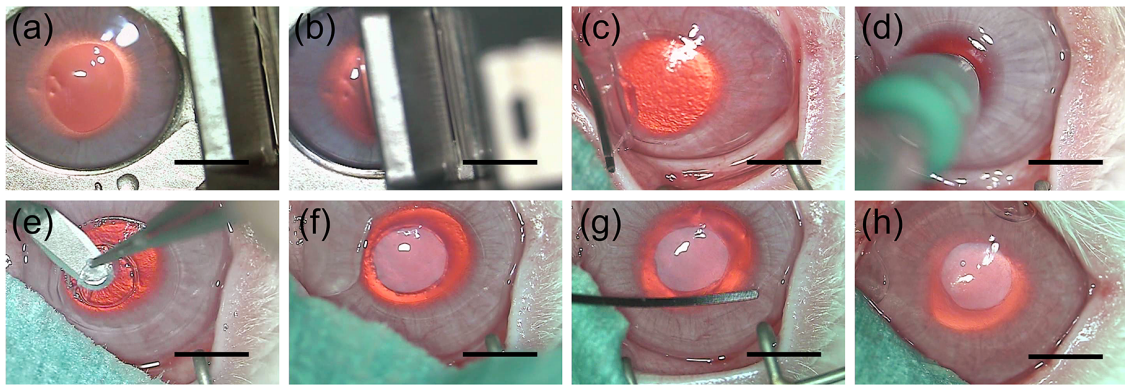

**Supplementary Figure 2. The surgical procedure of microkeratome-assisted anterior lamellar keratoplasty.** The corneal flap was prepared by a microkeratome (A–C). The recipient cornea was trephined using a 4.0 mm biopsy punch, and the discarded stromal tissue was removed (D, E). The decellularized cornea was placed on the corneal bed after keratectomy (F). The decellularized cornea was covered with a corneal flap, followed by a contact lens (G, H). Scale bar: 4 mm.
